# Supplementary material for: Newborn Screening for Severe Combined Immunodeficiency: Lessons Learned from Screening and Follow-Up of the Preterm Newborn Population
Source: MDPI journal article supplement (doi:10.3390/ijns9040068), 2023-12-15
Supplement: s1 [file s1]

EXCLUSION CRITERIA, COHORTS, AND DATA DEFINITION MATRIX FOR SCID PREMATURETY QI  
PROJECT

**EXCLUSION CRITERIA**

**BABIES WITH BIRTHWEIGHT >2500 grams**

**BABIES WITH GESTATIONAL AGE  $\geq 37$  weeks**

**UNSATISFACTORY SPECIMENS; INCLUDING BUT NOT LIMITED TO:**

- Poor Quality
- Transit Issues
- No DNA Amplification
- Any other reason(s) your laboratory may classify a specimen as unsatisfactory or invalid

**BABIES WITH OUT-OF-RANGE SCREENING RESULTS FOR ANYTHING OTHER THAN SCID/T-CELL LYMPHOPENIA (TCL)**

\* **NOTE:** If both birthweight and gestational age are collected and do not both fall in the premature/LBW category, please use gestational age as the deciding factor (e.g., a newborn with a birthweight of 2550g and a GA of 35 weeks would be *included*. A newborn with a birthweight of 2300g and a GA of 38 weeks would be *excluded*).

| COHORT                                                                                                                               | DESCRIPTION                                                                                                                                                                                                                                                                                                          |
|--------------------------------------------------------------------------------------------------------------------------------------|----------------------------------------------------------------------------------------------------------------------------------------------------------------------------------------------------------------------------------------------------------------------------------------------------------------------|
| <b>Random Sampling</b> of Low Birth Weight/Premature Babies with <b>ALL WITHIN-RANGE (SCREEN-NEGATIVE) Newborn Screening Results</b> | <ul style="list-style-type: none"> <li>• Only include babies with WITHIN-RANGE newborn screening results for ALL disorders</li> <li>• Exclude any infants with A&gt;F (transfusion) results</li> <li>• Only provide information from the initial valid screen collected between <b>24-48 hours of age</b></li> </ul> |
| <b>ALL</b> Low Birth Weight/Premature Babies with <b>OUT-OF-RANGE SCID/TCL Newborn Screening Results</b>                             | <ul style="list-style-type: none"> <li>• Include any babies who had an OUT-OF-RANGE (repeat screen or clinical evaluation request) for SCID/TCL</li> <li>• Include information on ALL associated screens for the patient</li> </ul>                                                                                  |

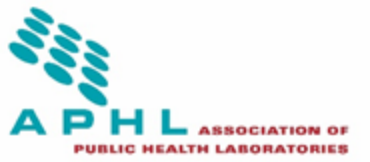

## RANDOM SAMPLING INSTRUCTIONS

1. For each calendar year requested, you will provide APHL with a data file that only contains the following elements:
  - a. State Abbreviation (e.g, NY, MN, etc)
  - b. Patient Identifier
  - c. Birthweight
  - d. Sex
  - e. Gestational Age
  - f. Birth year
  
2. From this file, we will apply our own process to get a random sampling and send you back a list of patient identifiers for which we would like the additional related information
  - a. You will then take that list of patients, and send us back the complete information as outlined below

## DATA DEFINITION MATRIX FOR PATIENT LEVEL DATA

| FIELD NAME | DATA TYPE | DATA FORMAT | DESCRIPTION                   | EXAMPLE | REQUIRED FOR?                                      | ACCEPTABLE NULL VALUE? |
|------------|-----------|-------------|-------------------------------|---------|----------------------------------------------------|------------------------|
| State      | Char      | XX          | Two Letter State Abbreviation | NY      | Screen-Negative Cohort<br>Out-of-Range SCID Cohort | N                      |
| Patient ID | VarChar   |             | Unique Patient Identifier     |         | Screen-Negative Cohort<br>Out-of-Range SCID Cohort | N                      |

|                                  |         |      |                                                                                                                                                                                                   |      |                                                    |   |
|----------------------------------|---------|------|---------------------------------------------------------------------------------------------------------------------------------------------------------------------------------------------------|------|----------------------------------------------------|---|
|                                  |         |      | <p>Same Patient Identifier should be repeated for all screens associated with a single patient</p> <p>Patient Identifier can be Program Defined</p>                                               |      |                                                    |   |
| <b>Birthweight</b>               | Numeric | NNNN | Birthweight in Grams                                                                                                                                                                              | 1800 | Screen-Negative Cohort<br>Out-of-Range SCID Cohort | N |
| <b>Gestational Age</b>           | Numeric | NN   | Gestational Age (in weeks truncated to the integer portion – ex. 35 and 6 days would become 35 weeks gestation)                                                                                   | 32   | Screen-Negative Cohort<br>Out-of-Range SCID Cohort | Y |
| <b>Birth Year</b>                | Date    | YYYY | Year of Birth                                                                                                                                                                                     | 2019 | Screen-Negative Cohort<br>Out-of-Range SCID Cohort | N |
| <b>Sex</b>                       | Char    | X    | <p>Indicate reported sex of newborn at birth:</p> <p>M = Male<br/>F = Female<br/>U = Unknown</p>                                                                                                  | F    | Screen-Negative Cohort<br>Out-of-Range SCID Cohort | N |
| <b>Age at Time of Collection</b> | Numeric | NN   | Age at Collection in Hours                                                                                                                                                                        | 36   | Screen-Negative Cohort<br>Out-of-Range SCID Cohort | N |
| <b>TREC/Ct/MoM Value</b>         | Numeric |      | <p>Provide numeric value for TREC/Ct/MoM values.</p> <p>If have multiple values, please only provide the value that is used to determine the screening results/interpretation in your program</p> |      | Screen-Negative Cohort<br>Out-of-Range SCID Cohort | N |

|                                                                                                       |         |   |                                                                                                                                                                                                                                                                                                                                                |   |                                                    |   |
|-------------------------------------------------------------------------------------------------------|---------|---|------------------------------------------------------------------------------------------------------------------------------------------------------------------------------------------------------------------------------------------------------------------------------------------------------------------------------------------------|---|----------------------------------------------------|---|
|                                                                                                       |         |   | Provide results to whichever decimal place you use in your program                                                                                                                                                                                                                                                                             |   |                                                    |   |
| <b>Analyte Value Units</b>                                                                            | VarChar |   | Use the Following Descriptors Only: <ul style="list-style-type: none"> <li>• TREC<sub>s</sub>/μl</li> <li>• Ct (or Cq)</li> <li>• MoM</li> </ul>                                                                                                                                                                                               |   | Screen-Negative Cohort<br>Out-of-Range SCID Cohort | N |
| <b>Median TREC or Ct Value</b><br><i>(*for those reporting TREC<sub>s</sub>/μl or Ct values only)</i> | Numeric |   | Provide the population median used to calculate the cut-off utilized at the time the newborn was screened<br><br><i><b>NOTE:</b> This value will likely be the same across multiple newborns and will only change if the cut-off was changed secondary to a shift in population median</i>                                                     |   | Screen-Negative Cohort<br>Out-of-Range SCID Cohort | N |
| <b>Transfusion Status</b>                                                                             | Y/N/U   | X | Indicate whether the child was transfused (using results from the Hgb assay indicating A>F) as:<br><br><b>Y: Yes</b><br><b>N: No</b><br><b>U: Unknown</b><br><br>Use 'U' in the following circumstances: <ul style="list-style-type: none"> <li>• Discrepancy is seen between information provided on NBS kit and Hgb assay results</li> </ul> | Y | Out-of-Range SCID Cohort                           | N |

|                                                |         |  |                                                                                                                                                                                                                                                                                                                                                                                                                                                                                                                           |  |                          |   |
|------------------------------------------------|---------|--|---------------------------------------------------------------------------------------------------------------------------------------------------------------------------------------------------------------------------------------------------------------------------------------------------------------------------------------------------------------------------------------------------------------------------------------------------------------------------------------------------------------------------|--|--------------------------|---|
|                                                |         |  | <ul style="list-style-type: none"> <li>A&gt;F findings in older babies who may have already transitioned from fetal to adult hemoglobin</li> </ul>                                                                                                                                                                                                                                                                                                                                                                        |  |                          |   |
| <b>Screen Interpretation/ Resulting Action</b> | VarChar |  | <p>Use the Following Descriptors Only:</p> <ul style="list-style-type: none"> <li><b>Additional Repeat Requested</b><br/><i>(Only includes additional requested repeat screens outside of the normal, routine screening process)</i></li> <li><b>Routine Repeat Process</b><br/><i>(Use this if the recommendation is to simply follow the typical screening process (e.g., for LBW infants, the recommendation is to wait for the normal second specimen)</i></li> <li><b>Clinical Evaluation Recommended</b></li> </ul> |  | Out-of-Range SCID Cohort | N |
| <b>Final Outcome</b>                           | VarChar |  | <p>Use the following Descriptors Only:</p> <ul style="list-style-type: none"> <li><b>SCID</b> <i>(Includes Typical, Omenn, Leaky)</i></li> <li><b>Non-SCID T-cell lymphopenia</b> <i>(Includes syndrome, secondary)</i></li> <li><b>Transient T-cell lymphopenia</b></li> <li><b>False positive</b> <i>(Use this designation only if the newborn had a diagnostic clinical work-up)</i></li> </ul>                                                                                                                        |  | Out-of-Range SCID Cohort | N |

|                                                          |                     |  |                                                                                                                                                                                                                                              |  |                          |   |
|----------------------------------------------------------|---------------------|--|----------------------------------------------------------------------------------------------------------------------------------------------------------------------------------------------------------------------------------------------|--|--------------------------|---|
|                                                          |                     |  | <ul style="list-style-type: none"> <li>• <b>Normal repeat screen</b></li> </ul> <p>Programs are highly encouraged to use NewSTEPS <a href="#">case definitions</a> to report final outcome.</p>                                              |  |                          |   |
| <b>Other Relevant Demographic or Medical Information</b> | VarChar             |  | If available, provide any additional relevant medical information that may help explain the SCID/TCL screening results. Examples include: mother receiving immunosuppressive therapy, cardiac surgery on baby, Plain clothes community, etc. |  | Out-of-Range SCID Cohort | Y |
| <b>Flow Data</b>                                         | Var Char<br>Numeric |  | <p>If available, provide the following values for confirmed True Positive cases:</p> <ul style="list-style-type: none"> <li>• CD45RA</li> <li>• CD3+</li> <li>• ALC (absolute lymphocyte count)</li> </ul>                                   |  | Out-of-Range SCID Cohort | Y |

#### AGGREGATE SCID/TCL DATA FOR YEARS 2018, 2019, AND 2020

| DATA ELEMENT                                          | DESCRIPTION                                                                                  |
|-------------------------------------------------------|----------------------------------------------------------------------------------------------|
| <b>Total number of babies screened by NBS Program</b> | Provide total number of babies screened (regardless of birthweight/GA) by each calendar year |

|                                                                                                            |                                                                                                                                                                                                                                                                                                                                                                                                                                                                             |
|------------------------------------------------------------------------------------------------------------|-----------------------------------------------------------------------------------------------------------------------------------------------------------------------------------------------------------------------------------------------------------------------------------------------------------------------------------------------------------------------------------------------------------------------------------------------------------------------------|
|                                                                                                            | This number should be the total number of babies screened by the program, regardless of state of residence                                                                                                                                                                                                                                                                                                                                                                  |
| <b>Total number of babies with out-of-range results for SCID/TCL</b>                                       | Provide total number of babies (regardless of birthweight/GA) with out-of-range results for SCID/TCL by each calendar year                                                                                                                                                                                                                                                                                                                                                  |
| <b>Total number of babies with out-of-range SCID/TCL results where a repeat screen was requested</b>       | <p>Of the total number of babies (regardless of birthweight/GA) with out-of-range results for SCID/TCL, provide the number of babies whose results led to a request for a repeat NBS screen</p> <p><b><i>Only count a baby once. If a baby had both a 'repeat requested' result and a 'clinical evaluation' result, count the baby in the 'Total number of babies with out-of-range SCID/TCL results where clinical evaluation was recommended' category</i></b></p>        |
| <b>Total number of babies with out-of-range SCID/TCL results where clinical evaluation was recommended</b> | <p>Of the total number of babies (regardless of birthweight/GA) with out-of-range results for SCID/TCL, provide the number of babies whose results led to a recommendation for clinical evaluation</p> <p><b><i>Only count a baby once. If a baby had both a 'repeat requested' result and a 'clinical evaluation' result, count the baby in the 'Total number of babies with out-of-range SCID/TCL results where clinical evaluation was recommended' category</i></b></p> |
